# Supplementary material
Source: publisher site journal article supplement (https://static.cambridge.org/content/id/urn:cambridge.org:id:article:S1041610220000733/resource/name/S1041610220000733supp003.docx)
Supplement: Supplementary file 1 [file S1041610220000733supp003.docx]

## **Supplementary Table 1: Applied search terms**

| #1 Nursing homes [MeSH] *OR* residential facilit* *OR* nursing facilit* *OR* long-term car* *OR* care home *OR* home for the aged *OR* institutional* *OR* assisted living |
| --- |
| # 2 sleep [MeSH] *OR* insomnia [MeSH] *OR* sleep wake cycle disorders [MeSH] *OR* sleep initiation and maintenance disorders[MeSH] *OR* circadian rhythm sleep disorders[MeSH] *OR* circadian *OR* sleep* |
| #1 *AND* #2 |
